# Supplementary material
Source: PubMed Central journal article supplement (PMC10524372)
Supplement: NIHMS1891025-supplement-Supplement.pdf [file NIHMS1891025-supplement-Supplement.pdf]

# Supporting Information for “Generalized Phase I-II Designs to Increase Long Term Therapeutic Success Rate” by P.F. Thall, Y. Zang and Y. Yuan.

## Definition of the Adaptive Randomization Probabilities

For the fixed design parameter  $0 \leq \zeta \leq 1$ ,  $n = n_1 + 1, \dots, n_{1,2} = n_1 + n_2$ , and acceptable dose set  $\mathcal{A}_n$ , given the data  $\mathcal{D}_n$ , the adaptive randomization used in stage 2 of the Gen I-II design gives dose  $d_j \in \mathcal{A}_n$  to the  $n^{\text{th}}$  patient with the following probability:

$$r_{j,n} = \frac{(\hat{\phi}_{j,n})^\zeta}{\sum_{l:d_l \in \mathcal{A}_n} (\hat{\phi}_{l,n})^\zeta}.$$

Values  $\zeta < 1$  shrink  $r_{j,n}$  toward the fair randomization probability  $1/|\mathcal{A}_n|$ , which corresponds to  $\zeta = 0$ . The value  $\zeta = 1/2$  was used for the design in the simulation study.

## Likelihood and Generation of Outcome Variables for the Simulations

The joint likelihood of data  $\mathcal{D}_n$  from  $n$  patients is given by the product

$$\mathcal{L}(\mathcal{D}_n, \boldsymbol{\theta}) = \prod_{i=1}^n \pi_Y(Y_i | d_{[i]}, \boldsymbol{\theta}) \left[ \{f_Z(Z_i^o | Y_i, d_{[i]}, \boldsymbol{\theta})\}^{\delta_i} \{S_Z(Z_i^o | Y_i, d_{[i]}, \boldsymbol{\theta})\}^{(1-\delta_i)} \right]^{I[Y'_{i,R} > 0]}$$

and the posterior is  $p(\boldsymbol{\theta} | \mathcal{D}_n) \propto \mathcal{L}(\mathcal{D}_n, \boldsymbol{\theta})p(\boldsymbol{\theta} | \tilde{\boldsymbol{\theta}})$ .

To generate  $(Y'_R, Y_T)$ , we assumed latent variables  $\mathbf{W} = (W_{R'}, W_T)$  following a bivariate

normal distribution with mean (0,0), variances 1, and correlation .20, and defined

$$Y_T = \begin{cases} 0 & \text{if } W_T < \kappa_T(d_j) \\ 1 & \text{if } W_T \geq \kappa_T(d_j) \end{cases}, \quad Y_{R'} = \begin{cases} 0 & \text{if } W_{R'} < \kappa_{R'1}(d_j) \\ 1 & \text{if } \kappa_{R'1}(d_j) \leq W_{R'} < \kappa_{R'2}(d_j) \\ 2 & \text{if } W_{R'} \geq \kappa_{R'2}(d_j) \end{cases}.$$

To generate PFS time, we assumed  $[Z \mid Y_{R'} > 0, Y_T, d_j]$  followed a piecewise exponential distribution with probability density function

$$f_Z(Z \mid Y_{R'}, Y_T, d_j) = \exp\{-Z/\tilde{\lambda}(Z)\}, \quad 0 < Z \leq 5,$$

with piecewise log hazard

$$\log\{\tilde{\lambda}(Z)\} = \begin{cases} \tilde{\beta}_{01} + \tilde{\beta}_{R1}I[Y_{R'} = 2] + \tilde{\beta}_{T1}Y_T + \tilde{\gamma}_{j1}I[j > 1] & \text{if } 0 < Z \leq 2.5 \\ \tilde{\beta}_{02} + \tilde{\beta}_{R2}I[Y_{R'} = 2] + \tilde{\beta}_{T2}Y_T + \tilde{\gamma}_{j2}I[j > 1] & \text{if } 2.5 < Z \leq 5 \end{cases}$$

The parameters  $\kappa_T(d_j)$ ,  $\kappa_{R'1}(d_j)$ ,  $\kappa_{R'2}(d_j)$ ,  $\tilde{\beta}_{0l}$ ,  $\tilde{\beta}_{Rl}$ ,  $\tilde{\beta}_{Tl}$  and  $\tilde{\gamma}_{j1}$ ,  $\tilde{\gamma}_{j2}$  were derived under each scenario to match the pre-determined  $\phi(d_j)^{true}$  and  $\xi(d_j)^{true}$  values for  $j = 1, \dots, 4$ .

Table S1. Sensitivity analysis for the effect of AR in stage 2 of the Gen I-II design.

| Designs           |                       | Dose levels |      |      |      |      | Sample size | R (%) |
|-------------------|-----------------------|-------------|------|------|------|------|-------------|-------|
|                   |                       | 0           | 1    | 2    | 3    | 4    |             |       |
| <i>Scenario 1</i> |                       |             |      |      |      |      |             |       |
| With AR           | $\pi_T^{true}(d_j)$   |             | 0.1  | 0.2  | 0.4  | 0.5  |             |       |
|                   | $\pi_R^{true}(d_j)$   |             | 0.3  | 0.4  | 0.5  | 0.55 |             |       |
|                   | $\bar{U}^{true}(d_j)$ |             | 59.1 | 62.5 | 60.9 | 59.9 |             |       |
|                   | $\xi^{true}(d_j)$     |             | 0.05 | 0.1  | 0.15 | 0.3  |             |       |
|                   | Selection (%)         | 93.5        | 0    | 0.5  | 2.6  | 3.3  | 35.6        | NA    |
| Without AR        | Patients (#)          |             | 9.5  | 13.5 | 8.8  | 3.7  |             |       |
|                   | Selection (%)         | 94.8        | 0    | 0.5  | 1.8  | 2.9  | 41.4        | NA    |
|                   | Patients (#)          |             | 10.8 | 16.2 | 10.1 | 4.2  |             |       |
| <i>Scenario 2</i> |                       |             |      |      |      |      |             |       |
| With AR           | $\pi_T^{true}(d_j)$   |             | 0.05 | 0.2  | 0.4  | 0.5  |             |       |
|                   | $\pi_R^{true}(d_j)$   |             | 0.6  | 0.65 | 0.55 | 0.4  |             |       |
|                   | $\bar{U}^{true}(d_j)$ |             | 76.7 | 68.0 | 54.0 | 40.4 |             |       |
|                   | $\xi^{true}(d_j)$     |             | 0.1  | 0.15 | 0.15 | 0.15 |             |       |
|                   | Selection (%)         | 83.8        | 2.3  | 9.6  | 4.1  | 0.2  | 48.2        | NA    |
| Without AR        | Patients (#)          |             | 21.5 | 16.4 | 7.4  | 2.8  |             |       |
|                   | Selection (%)         | 86.7        | 0.8  | 8.1  | 3.8  | 0.5  | 60.4        | NA    |
|                   | Patients (#)          |             | 32.7 | 18.2 | 6.9  | 2.7  |             |       |
| <i>Scenario 3</i> |                       |             |      |      |      |      |             |       |
| With AR           | $\pi_T^{true}(d_j)$   |             | 0.04 | 0.06 | 0.08 | 0.1  |             |       |
|                   | $\pi_R^{true}(d_j)$   |             | 0.4  | 0.5  | 0.6  | 0.6  |             |       |
|                   | $\bar{U}^{true}(d_j)$ |             | 61.2 | 67.0 | 74.2 | 75.0 |             |       |
|                   | $\xi^{true}(d_j)$     |             | 0.2  | 0.4  | 0.5  | 0.7  |             |       |
|                   | Selection (%)         | 2.9         | 0.3  | 7.0  | 19.3 | 70.5 | 52.7        | 91.0  |
| Without AR        | Patients (#)          |             | 10.6 | 13.0 | 14.9 | 14.3 |             |       |
|                   | Selection (%)         | 3.0         | 0.1  | 5.4  | 16.4 | 75.0 | 69.7        | 92.7  |
|                   | Patients (#)          |             | 11.6 | 15.2 | 21.4 | 21.5 |             |       |
| <i>Scenario 4</i> |                       |             |      |      |      |      |             |       |
| With AR           | $\pi_T^{true}(d_j)$   |             | 0.01 | 0.03 | 0.06 | 0.08 |             |       |
|                   | $\pi_R^{true}(d_j)$   |             | 0.6  | 0.7  | 0.7  | 0.7  |             |       |
|                   | $\bar{U}^{true}(d_j)$ |             | 72.1 | 80.9 | 81.3 | 80.6 |             |       |
|                   | $\xi^{true}(d_j)$     |             | 0.4  | 0.45 | 0.65 | 0.5  |             |       |
|                   | Selection (%)         | 0.1         | 4.3  | 9.2  | 69.1 | 17.2 | 58.1        | 91.5  |
| Without AR        | Patients (#)          |             | 13.9 | 15.1 | 14.8 | 14.4 |             |       |
|                   | Selection (%)         | 0           | 4.0  | 8.7  | 70.1 | 17.1 | 75.9        | 91.8  |
|                   | Patients (#)          |             | 14.6 | 21.0 | 20.8 | 19.6 |             |       |
| <i>Scenario 5</i> |                       |             |      |      |      |      |             |       |
| With AR           | $\pi_T^{true}(d_j)$   |             | 0.03 | 0.05 | 0.1  | 0.15 |             |       |
|                   | $\pi_R^{true}(d_j)$   |             | 0.4  | 0.6  | 0.75 | 0.65 |             |       |
|                   | $\bar{U}^{true}(d_j)$ |             | 63.1 | 75.2 | 82.3 | 72.7 |             |       |
|                   | $\xi^{true}(d_j)$     |             | 0.3  | 0.45 | 0.5  | 0.65 |             |       |
|                   | Selection (%)         | 1.2         | 1.4  | 14.2 | 24.1 | 59.1 | 54.3        | 89.1  |
| Without AR        | Patients (#)          |             | 10.5 | 14.7 | 15.8 | 13.3 |             |       |
|                   | Selection (%)         | 1.1         | 1.3  | 15.0 | 23.6 | 59.0 | 71.3        | 89.0  |
|                   | Patients (#)          |             | 10.4 | 18.9 | 27.0 | 15.1 |             |       |

Table S1. (continued)

|            |               | <i>Scenario 6</i> |                       |      |      |      |      |      |  |
|------------|---------------|-------------------|-----------------------|------|------|------|------|------|--|
|            |               |                   | $\pi_T^{true}(d_j)$   | 0.02 | 0.04 | 0.07 | 0.1  |      |  |
|            |               |                   | $\pi_R^{true}(d_j)$   | 0.4  | 0.6  | 0.65 | 0.75 |      |  |
|            |               |                   | $\bar{U}^{true}(d_j)$ | 54.4 | 72.6 | 72.5 | 77.8 |      |  |
|            |               |                   | $\xi^{true}(d_j)$     | 0.45 | 0.7  | 0.5  | 0.45 |      |  |
| With AR    | Selection (%) | 0.6               | 5.4                   | 68.4 | 15.7 | 9.8  | 54.3 | 90.0 |  |
|            | Patients (#)  |                   | 10.0                  | 14.4 | 14.7 | 15.2 |      |      |  |
| Without AR | Selection (%) | 0.7               | 5.5                   | 70.7 | 14.5 | 8.6  | 70.2 | 90.8 |  |
|            | Patients (#)  |                   | 9.4                   | 19.4 | 18.5 | 22.9 |      |      |  |
|            |               | <i>Scenario 7</i> |                       |      |      |      |      |      |  |
|            |               |                   | $\pi_T^{true}(d_j)$   | 0.03 | 0.05 | 0.1  | 0.15 |      |  |
|            |               |                   | $\pi_R^{true}(d_j)$   | 0.4  | 0.5  | 0.6  | 0.5  |      |  |
|            |               |                   | $\bar{U}^{true}(d_j)$ | 66.1 | 70.3 | 73.5 | 68.6 |      |  |
|            |               |                   | $\xi^{true}(d_j)$     | 0.3  | 0.45 | 0.65 | 0.4  |      |  |
| With AR    | Selection (%) | 3.3               | 2.0                   | 15.0 | 70.9 | 8.8  | 52.2 | 90.6 |  |
|            | Patients (#)  |                   | 11.2                  | 13.7 | 15.1 | 12.1 |      |      |  |
| Without AR | Selection (%) | 2.8               | 1.8                   | 13.9 | 74.6 | 7.0  | 69.9 | 91.9 |  |
|            | Patients (#)  |                   | 13.7                  | 18.8 | 21.9 | 15.5 |      |      |  |
|            |               | <i>Scenario 8</i> |                       |      |      |      |      |      |  |
|            |               |                   | $\pi_T^{true}(d_j)$   | 0.15 | 0.2  | 0.25 | 0.4  |      |  |
|            |               |                   | $\pi_R^{true}(d_j)$   | 0.6  | 0.7  | 0.6  | 0.5  |      |  |
|            |               |                   | $\bar{U}^{true}(d_j)$ | 71.8 | 77.8 | 68.5 | 56.4 |      |  |
|            |               |                   | $\xi^{true}(d_j)$     | 0.45 | 0.6  | 0.45 | 0.4  |      |  |
| With AR    | Selection (%) | 9.1               | 23.4                  | 56.9 | 9.0  | 1.6  | 47.7 | 90.5 |  |
|            | Patients (#)  |                   | 17.7                  | 14.8 | 9.9  | 5.3  |      |      |  |
| Without AR | Selection (%) | 8.0               | 20.2                  | 62.5 | 7.8  | 1.6  | 62.7 | 91.8 |  |
|            | Patients (#)  |                   | 21.2                  | 24.3 | 11.8 | 5.4  |      |      |  |
|            |               | <i>Scenario 9</i> |                       |      |      |      |      |      |  |
|            |               |                   | $\pi_T^{true}(d_j)$   | 0.02 | 0.1  | 0.2  | 0.5  |      |  |
|            |               |                   | $\pi_R^{true}(d_j)$   | 0.6  | 0.6  | 0.6  | 0.6  |      |  |
|            |               |                   | $\bar{U}^{true}(d_j)$ | 76.3 | 73.5 | 70.2 | 60.4 |      |  |
|            |               |                   | $\xi^{true}(d_j)$     | 0.4  | 0.45 | 0.6  | 0.65 |      |  |
| With AR    | Selection (%) | 1.3               | 18.2                  | 22.5 | 51.2 | 6.8  | 51.6 | 88.7 |  |
|            | Patients (#)  |                   | 17.2                  | 15.6 | 12.8 | 5.9  |      |      |  |
| Without AR | Selection (%) | 1.1               | 13.7                  | 23.2 | 53.8 | 8.2  | 68.2 | 90.2 |  |
|            | Patients (#)  |                   | 25.0                  | 21.1 | 15.9 | 6.2  |      |      |  |

Table S2. Sensitivity analysis of  $\rho$  for determining the candidate dose set.

| $\rho$            |                       | Dose levels |      |      |      | Sample size | R (%) |      |
|-------------------|-----------------------|-------------|------|------|------|-------------|-------|------|
|                   |                       | 0           | 1    | 2    | 3    |             |       | 4    |
| <i>Scenario 1</i> |                       |             |      |      |      |             |       |      |
|                   | $\pi_T^{true}(d_j)$   |             | 0.1  | 0.2  | 0.4  | 0.5         |       |      |
|                   | $\pi_R^{true}(d_j)$   |             | 0.3  | 0.4  | 0.5  | 0.55        |       |      |
|                   | $\bar{U}^{true}(d_j)$ |             | 59.1 | 62.5 | 60.9 | 59.9        |       |      |
|                   | $\xi^{true}(d_j)$     |             | 0.05 | 0.1  | 0.15 | 0.3         |       |      |
| 0.6               | Selection (%)         | 93.6        | 0    | 0.5  | 2.6  | 3.3         | 35.4  | NA   |
|                   | Patients (#)          |             | 9.5  | 13.5 | 8.7  | 3.6         |       |      |
| 0.7               | Selection (%)         | 93.5        | 0    | 0.5  | 2.6  | 3.3         | 35.6  | NA   |
|                   | Patients (#)          |             | 9.5  | 13.5 | 8.8  | 3.7         |       |      |
| 0.8               | Selection (%)         | 93.9        | 0    | 0.5  | 2.0  | 3.5         | 35.0  | NA   |
|                   | Patients (#)          |             | 9.4  | 13.4 | 8.6  | 3.6         |       |      |
| 0.9               | Selection (%)         | 95.0        | 0    | 0.5  | 2.2  | 2.3         | 35.2  | NA   |
|                   | Patients (#)          |             | 9.4  | 13.5 | 8.7  | 3.6         |       |      |
| <i>Scenario 2</i> |                       |             |      |      |      |             |       |      |
|                   | $\pi_T^{true}(d_j)$   |             | 0.05 | 0.2  | 0.4  | 0.5         |       |      |
|                   | $\pi_R^{true}(d_j)$   |             | 0.6  | 0.65 | 0.55 | 0.4         |       |      |
|                   | $\bar{U}^{true}(d_j)$ |             | 76.7 | 68.0 | 54.0 | 40.4        |       |      |
|                   | $\xi^{true}(d_j)$     |             | 0.1  | 0.15 | 0.15 | 0.15        |       |      |
| 0.6               | Selection (%)         | 82.3        | 2.2  | 9.8  | 5.1  | 0.6         | 48.5  | NA   |
|                   | Patients (#)          |             | 21.2 | 16.6 | 7.8  | 3.0         |       |      |
| 0.7               | Selection (%)         | 83.8        | 2.3  | 9.6  | 4.1  | 0.2         | 48.2  | NA   |
|                   | Patients (#)          |             | 21.5 | 16.4 | 7.4  | 2.8         |       |      |
| 0.8               | Selection (%)         | 86.4        | 2.4  | 8.5  | 2.5  | 0.2         | 47.9  | NA   |
|                   | Patients (#)          |             | 21.7 | 16.2 | 7.1  | 2.8         |       |      |
| 0.9               | Selection (%)         | 90.0        | 2.4  | 6.5  | 1.0  | 0           | 47.6  | NA   |
|                   | Patients (#)          |             | 21.3 | 16.4 | 7.1  | 2.8         |       |      |
| <i>Scenario 3</i> |                       |             |      |      |      |             |       |      |
|                   | $\pi_T^{true}(d_j)$   |             | 0.04 | 0.06 | 0.08 | 0.1         |       |      |
|                   | $\pi_R^{true}(d_j)$   |             | 0.4  | 0.5  | 0.6  | 0.6         |       |      |
|                   | $\bar{U}^{true}(d_j)$ |             | 61.2 | 67.0 | 74.2 | 75.0        |       |      |
|                   | $\xi^{true}(d_j)$     |             | 0.2  | 0.4  | 0.5  | 0.7         |       |      |
| 0.6               | Selection (%)         | 3.1         | 0.4  | 6.9  | 19.3 | 70.4        | 53.2  | 91.0 |
|                   | Patients (#)          |             | 11.0 | 13.2 | 14.9 | 14.1        |       |      |
| 0.7               | Selection (%)         | 2.9         | 0.3  | 7.0  | 19.3 | 70.5        | 52.7  | 91.0 |
|                   | Patients (#)          |             | 10.6 | 13.0 | 14.9 | 14.3        |       |      |
| 0.8               | Selection (%)         | 3.3         | 0.3  | 6.9  | 20.5 | 69.0        | 51.6  | 90.7 |
|                   | Patients (#)          |             | 10.2 | 12.8 | 14.6 | 14.0        |       |      |
| 0.9               | Selection (%)         | 3.2         | 0.7  | 8.5  | 28.9 | 58.6        | 50.0  | 87.1 |
|                   | Patients (#)          |             | 9.8  | 12.2 | 14.3 | 13.6        |       |      |
| <i>Scenario 4</i> |                       |             |      |      |      |             |       |      |
|                   | $\pi_T^{true}(d_j)$   |             | 0.01 | 0.03 | 0.06 | 0.08        |       |      |
|                   | $\pi_R^{true}(d_j)$   |             | 0.6  | 0.7  | 0.7  | 0.7         |       |      |
|                   | $\bar{U}^{true}(d_j)$ |             | 72.1 | 80.9 | 81.3 | 80.6        |       |      |
|                   | $\xi^{true}(d_j)$     |             | 0.4  | 0.45 | 0.65 | 0.5         |       |      |
| 0.6               | Selection (%)         | 0.1         | 4.8  | 9.6  | 69.0 | 16.4        | 58.6  | 91.3 |
|                   | Patients (#)          |             | 14.1 | 15.2 | 14.8 | 14.5        |       |      |
| 0.7               | Selection (%)         | 0.1         | 4.3  | 9.5  | 69.1 | 17.2        | 58.1  | 91.5 |
|                   | Patients (#)          |             | 13.9 | 15.1 | 14.8 | 14.4        |       |      |
| 0.8               | Selection (%)         | 0           | 4.2  | 12.3 | 65.1 | 18.3        | 56.5  | 90.3 |
|                   | Patients (#)          |             | 13.0 | 14.8 | 14.5 | 14.1        |       |      |
| 0.9               | Selection (%)         | 0.2         | 5.7  | 17.6 | 54.5 | 22.0        | 53.2  | 87.2 |
|                   | Patients (#)          |             | 12.1 | 14.1 | 13.8 | 13.2        |       |      |

Table S2. (continued)

| $\rho$            |                       | Dose levels |      |      |      | Sample size | R (%) |      |
|-------------------|-----------------------|-------------|------|------|------|-------------|-------|------|
|                   |                       | 0           | 1    | 2    | 3    |             |       | 4    |
| <i>Scenario 5</i> |                       |             |      |      |      |             |       |      |
|                   | $\pi_T^{true}(d_j)$   |             | 0.03 | 0.05 | 0.1  | 0.15        |       |      |
|                   | $\pi_R^{true}(d_j)$   |             | 0.4  | 0.6  | 0.75 | 0.65        |       |      |
|                   | $\bar{U}^{true}(d_j)$ |             | 63.1 | 75.2 | 82.3 | 72.7        |       |      |
|                   | $\xi^{true}(d_j)$     |             | 0.3  | 0.45 | 0.5  | 0.65        |       |      |
| 0.6               | Selection (%)         | 1.4         | 1.4  | 13.3 | 22.9 | 61.0        | 54.8  | 89.6 |
|                   | Patients (#)          |             | 10.7 | 14.7 | 15.8 | 13.6        |       |      |
| 0.7               | Selection (%)         | 1.2         | 1.4  | 14.2 | 24.1 | 59.1        | 54.3  | 89.1 |
|                   | Patients (#)          |             | 10.5 | 14.7 | 15.8 | 13.3        |       |      |
| 0.8               | Selection (%)         | 1.1         | 12.8 | 16.3 | 30.9 | 50.5        | 52.8  | 86.8 |
|                   | Patients (#)          |             | 9.8  | 14.4 | 15.7 | 12.8        |       |      |
| 0.9               | Selection (%)         | 1.6         | 11.2 | 18.4 | 48.8 | 30.0        | 50.6  | 81.9 |
|                   | Patients (#)          |             | 9.3  | 13.8 | 15.6 | 12.0        |       |      |
| <i>Scenario 6</i> |                       |             |      |      |      |             |       |      |
|                   | $\pi_T^{true}(d_j)$   |             | 0.02 | 0.04 | 0.07 | 0.1         |       |      |
|                   | $\pi_R^{true}(d_j)$   |             | 0.4  | 0.6  | 0.65 | 0.75        |       |      |
|                   | $\bar{U}^{true}(d_j)$ |             | 54.4 | 72.6 | 72.5 | 77.8        |       |      |
|                   | $\xi^{true}(d_j)$     |             | 0.45 | 0.7  | 0.5  | 0.45        |       |      |
| 0.6               | Selection (%)         | 0.8         | 5.0  | 71.4 | 14.3 | 8.6         | 55.2  | 91.0 |
|                   | Patients (#)          |             | 10.4 | 14.7 | 14.8 | 15.3        |       |      |
| 0.7               | Selection (%)         | 0.6         | 5.4  | 68.4 | 15.7 | 9.8         | 54.3  | 90.0 |
|                   | Patients (#)          |             | 10.0 | 14.4 | 14.7 | 15.2        |       |      |
| 0.8               | Selection (%)         | 0.6         | 4.2  | 64.5 | 17.0 | 13.6        | 52.6  | 88.7 |
|                   | Patients (#)          |             | 9.2  | 14.3 | 14.2 | 14.9        |       |      |
| 0.9               | Selection (%)         | 0.9         | 1.9  | 45.8 | 23.0 | 28.4        | 50.8  | 82.4 |
|                   | Patients (#)          |             | 8.9  | 13.6 | 13.7 | 14.5        |       |      |
| <i>Scenario 7</i> |                       |             |      |      |      |             |       |      |
|                   | $\pi_T^{true}(d_j)$   |             | 0.03 | 0.05 | 0.1  | 0.15        |       |      |
|                   | $\pi_R^{true}(d_j)$   |             | 0.4  | 0.5  | 0.6  | 0.5         |       |      |
|                   | $\bar{U}^{true}(d_j)$ |             | 66.1 | 70.3 | 73.5 | 68.6        |       |      |
|                   | $\xi^{true}(d_j)$     |             | 0.3  | 0.45 | 0.65 | 0.4         |       |      |
| 0.6               | Selection (%)         | 3.0         | 2.1  | 14.9 | 72.4 | 7.6         | 52.2  | 91.1 |
|                   | Patients (#)          |             | 11.1 | 13.9 | 15.3 | 12.0        |       |      |
| 0.7               | Selection (%)         | 3.3         | 2.0  | 15.0 | 70.9 | 8.8         | 52.2  | 90.6 |
|                   | Patients (#)          |             | 11.2 | 13.7 | 15.1 | 12.1        |       |      |
| 0.8               | Selection (%)         | 3.1         | 2.3  | 15.8 | 70.4 | 8.4         | 51.5  | 90.4 |
|                   | Patients (#)          |             | 10.8 | 13.5 | 15.3 | 11.8        |       |      |
| 0.9               | Selection (%)         | 3.6         | 4.3  | 20.6 | 60.6 | 11.0        | 50.0  | 86.7 |
|                   | Patients (#)          |             | 10.5 | 13.4 | 14.8 | 11.3        |       |      |
| <i>Scenario 8</i> |                       |             |      |      |      |             |       |      |
|                   | $\pi_T^{true}(d_j)$   |             | 0.15 | 0.2  | 0.25 | 0.4         |       |      |
|                   | $\pi_R^{true}(d_j)$   |             | 0.6  | 0.7  | 0.6  | 0.5         |       |      |
|                   | $\bar{U}^{true}(d_j)$ |             | 71.8 | 77.8 | 68.5 | 56.4        |       |      |
|                   | $\xi^{true}(d_j)$     |             | 0.45 | 0.6  | 0.45 | 0.4         |       |      |
| 0.6               | Selection (%)         | 8.6         | 22.5 | 58.1 | 9.2  | 1.6         | 48.2  | 90.7 |
|                   | Patients (#)          |             | 17.8 | 14.9 | 10.2 | 5.4         |       |      |
| 0.7               | Selection (%)         | 9.1         | 23.4 | 56.8 | 9.0  | 1.6         | 47.7  | 90.5 |
|                   | Patients (#)          |             | 17.7 | 14.8 | 9.9  | 5.3         |       |      |
| 0.8               | Selection (%)         | 8.9         | 22.5 | 59.2 | 8.3  | 1.1         | 47.2  | 91.1 |
|                   | Patients (#)          |             | 17.5 | 15.0 | 9.7  | 4.9         |       |      |
| 0.9               | Selection (%)         | 9.1         | 23.3 | 59.4 | 7.7  | 0.5         | 46.1  | 91.2 |
|                   | Patients (#)          |             | 17.1 | 14.8 | 9.5  | 4.7         |       |      |

Table S2. (continued)

| $\rho$            | Dose levels           |     |      |      |      | Sample size | R (%) |      |
|-------------------|-----------------------|-----|------|------|------|-------------|-------|------|
|                   | 0                     | 1   | 2    | 3    | 4    |             |       |      |
| <i>Scenario 9</i> |                       |     |      |      |      |             |       |      |
|                   | $\pi_T^{true}(d_j)$   |     | 0.02 | 0.1  | 0.2  | 0.5         |       |      |
|                   | $\pi_R^{true}(d_j)$   |     | 0.6  | 0.6  | 0.6  | 0.6         |       |      |
|                   | $\bar{U}^{true}(d_j)$ |     | 76.3 | 73.5 | 70.2 | 60.4        |       |      |
|                   | $\xi^{true}(d_j)$     |     | 0.4  | 0.45 | 0.6  | 0.65        |       |      |
| 0.6               | Selection (%)         | 1.0 | 13.7 | 21.4 | 55.3 | 8.6         | 51.8  | 90.7 |
|                   | Patients (#)          |     | 17.1 | 15.6 | 13.2 | 5.9         |       |      |
| 0.7               | Selection (%)         | 1.3 | 18.2 | 22.5 | 51.2 | 6.8         | 51.6  | 88.7 |
|                   | Patients (#)          |     | 17.2 | 15.6 | 12.8 | 5.9         |       |      |
| 0.8               | Selection (%)         | 1.1 | 21.0 | 27.0 | 45.8 | 5.1         | 50.6  | 86.5 |
|                   | Patients (#)          |     | 17.1 | 15.6 | 12.5 | 5.5         |       |      |
| 0.9               | Selection (%)         | 2.3 | 34.0 | 30.8 | 30.5 | 2.4         | 49.4  | 80.7 |
|                   | Patients (#)          |     | 17.0 | 14.7 | 12.3 | 5.4         |       |      |

Table S3. Sensitivity analysis for sample size allocation between stage 2 and stage 3, with stage 1 sample size fixed at  $n_1 = 15$ .

| $n_2; N(d)$           |                       | Dose levels |      |      |      | Sample size | R (%) |      |
|-----------------------|-----------------------|-------------|------|------|------|-------------|-------|------|
|                       |                       | 0           | 1    | 2    | 3    |             |       | 4    |
| <i>Scenario 1</i>     |                       |             |      |      |      |             |       |      |
| $n_2 = 39; N(d) = 9$  | $\pi_T^{true}(d_j)$   |             | 0.1  | 0.2  | 0.4  | 0.5         |       |      |
|                       | $\pi_R^{true}(d_j)$   |             | 0.3  | 0.4  | 0.5  | 0.55        |       |      |
| $n_2 = 33; N(d) = 15$ | $\bar{U}^{true}(d_j)$ |             | 59.1 | 62.5 | 60.9 | 59.9        |       |      |
|                       | $\xi^{true}(d_j)$     |             | 0.05 | 0.1  | 0.15 | 0.3         |       |      |
| $n_2 = 27; N(d) = 21$ | Selection (%)         | 94.9        | 0    | 0.5  | 1.8  | 2.8         | 37.4  | NA   |
|                       | Patients (#)          |             | 9.6  | 14.6 | 9.6  | 3.6         |       |      |
| $n_2 = 33; N(d) = 15$ | Selection (%)         | 93.5        | 0    | 0.5  | 2.6  | 3.3         | 35.6  | NA   |
|                       | Patients (#)          |             | 9.5  | 13.5 | 8.8  | 3.7         |       |      |
| $n_2 = 27; N(d) = 21$ | Selection (%)         | 94.1        | 0    | 0.6  | 2.1  | 3.2         | 35.8  | NA   |
|                       | Patients (#)          |             | 9.8  | 13.2 | 8.9  | 4.0         |       |      |
| <i>Scenario 2</i>     |                       |             |      |      |      |             |       |      |
| $n_2 = 39; N(d) = 9$  | $\pi_T^{true}(d_j)$   |             | 0.05 | 0.2  | 0.4  | 0.5         |       |      |
|                       | $\pi_R^{true}(d_j)$   |             | 0.6  | 0.65 | 0.55 | 0.4         |       |      |
| $n_2 = 33; N(d) = 15$ | $\bar{U}^{true}(d_j)$ |             | 76.7 | 68.0 | 54.0 | 40.4        |       |      |
|                       | $\xi^{true}(d_j)$     |             | 0.1  | 0.15 | 0.15 | 0.15        |       |      |
| $n_2 = 39; N(d) = 9$  | Selection (%)         | 85.5        | 1.7  | 8.4  | 4.1  | 0.3         | 52.8  | NA   |
|                       | Patients (#)          |             | 23.9 | 18.5 | 7.6  | 2.8         |       |      |
| $n_2 = 33; N(d) = 15$ | Selection (%)         | 83.8        | 2.3  | 9.6  | 4.1  | 0.2         | 48.2  | NA   |
|                       | Patients (#)          |             | 21.5 | 16.4 | 7.4  | 2.8         |       |      |
| $n_2 = 27; N(d) = 21$ | Selection (%)         | 88.6        | 1.4  | 7.6  | 2.1  | 0.3         | 50.8  | NA   |
|                       | Patients (#)          |             | 21.7 | 17.8 | 8.4  | 3.0         |       |      |
| <i>Scenario 3</i>     |                       |             |      |      |      |             |       |      |
| $n_2 = 39; N(d) = 9$  | $\pi_T^{true}(d_j)$   |             | 0.04 | 0.06 | 0.08 | 0.1         |       |      |
|                       | $\pi_R^{true}(d_j)$   |             | 0.4  | 0.5  | 0.6  | 0.6         |       |      |
| $n_2 = 33; N(d) = 15$ | $\bar{U}^{true}(d_j)$ |             | 61.2 | 67.0 | 74.2 | 75.0        |       |      |
|                       | $\xi^{true}(d_j)$     |             | 0.2  | 0.4  | 0.5  | 0.7         |       |      |
| $n_2 = 39; N(d) = 9$  | Selection (%)         | 3.1         | 0.3  | 6.8  | 19.8 | 70.0        | 53.2  | 90.9 |
|                       | Patients (#)          |             | 10.3 | 13.0 | 15.4 | 14.5        |       |      |
| $n_2 = 33; N(d) = 15$ | Selection (%)         | 2.9         | 0.3  | 7.0  | 19.3 | 70.5        | 52.7  | 91.0 |
|                       | Patients (#)          |             | 10.6 | 13.0 | 14.9 | 14.3        |       |      |
| $n_2 = 27; N(d) = 21$ | Selection (%)         | 2.7         | 0.4  | 5.1  | 16.9 | 74.9        | 65.2  | 92.5 |
|                       | Patients (#)          |             | 12.9 | 16.0 | 18.4 | 17.9        |       |      |
| <i>Scenario 4</i>     |                       |             |      |      |      |             |       |      |
| $n_2 = 39; N(d) = 9$  | $\pi_T^{true}(d_j)$   |             | 0.01 | 0.03 | 0.06 | 0.08        |       |      |
|                       | $\pi_R^{true}(d_j)$   |             | 0.6  | 0.7  | 0.7  | 0.7         |       |      |
| $n_2 = 33; N(d) = 15$ | $\bar{U}^{true}(d_j)$ |             | 72.1 | 80.9 | 81.3 | 80.6        |       |      |
|                       | $\xi^{true}(d_j)$     |             | 0.4  | 0.45 | 0.65 | 0.5         |       |      |
| $n_2 = 39; N(d) = 9$  | Selection (%)         | 0.1         | 5.0  | 10.6 | 66.8 | 17.6        | 54.2  | 90.7 |
|                       | Patients (#)          |             | 12.9 | 14.3 | 13.8 | 13.2        |       |      |
| $n_2 = 33; N(d) = 15$ | Selection (%)         | 0.1         | 4.3  | 9.2  | 69.1 | 17.2        | 58.1  | 91.5 |
|                       | Patients (#)          |             | 13.9 | 15.1 | 14.8 | 14.4        |       |      |
| $n_2 = 27; N(d) = 21$ | Selection (%)         | 0.1         | 3.2  | 8.1  | 73.9 | 14.6        | 77.0  | 92.8 |
|                       | Patients (#)          |             | 17.6 | 20.0 | 19.9 | 19.5        |       |      |



Table S3. (continued)

| $n_2; N(d)$           |                       | Dose levels |                   |      |      |      | Sample size | R (%) |
|-----------------------|-----------------------|-------------|-------------------|------|------|------|-------------|-------|
|                       |                       | 0           | 1                 | 2    | 3    | 4    |             |       |
| <i>Scenario 5</i>     |                       |             |                   |      |      |      |             |       |
|                       | $\pi_T^{true}(d_j)$   |             | 0.03              | 0.05 | 0.1  | 0.15 |             |       |
|                       | $\pi_R^{true}(d_j)$   |             | 0.4               | 0.6  | 0.75 | 0.65 |             |       |
|                       | $\bar{U}^{true}(d_j)$ |             | 63.1              | 75.2 | 82.3 | 72.7 |             |       |
|                       | $\xi^{true}(d_j)$     |             | 0.3               | 0.45 | 0.5  | 0.65 |             |       |
| $n_2 = 39; N(d) = 9$  | Selection (%)         | 1.2         | 1.4               | 14.7 | 22.7 | 60.0 | 53.7        | 89.2  |
|                       | Patients (#)          |             | 9.7               | 14.9 | 16.2 | 12.9 |             |       |
| $n_2 = 33; N(d) = 15$ | Selection (%)         | 1.2         | 1.4               | 14.2 | 24.1 | 59.1 | 54.3        | 89.1  |
|                       | Patients (#)          |             | 10.5              | 14.7 | 15.8 | 13.3 |             |       |
| $n_2 = 27; N(d) = 21$ | Selection (%)         | 1.1         | 1.1               | 13.6 | 22.9 | 61.3 | 68.9        | 89.7  |
|                       | Patients (#)          |             | 13.0              | 18.9 | 19.9 | 17.1 |             |       |
| <i>Scenario 6</i>     |                       |             |                   |      |      |      |             |       |
|                       | $\pi_T^{true}(d_j)$   |             | 0.02              | 0.04 | 0.07 | 0.1  |             |       |
|                       | $\pi_R^{true}(d_j)$   |             | 0.4               | 0.6  | 0.65 | 0.75 |             |       |
|                       | $\bar{U}^{true}(d_j)$ |             | 54.4              | 72.6 | 72.5 | 77.8 |             |       |
|                       | $\xi^{true}(d_j)$     |             | 0.45              | 0.7  | 0.5  | 0.45 |             |       |
| $n_2 = 39; N(d) = 9$  | Selection (%)         | 0.7         | 5.6               | 70.3 | 14.6 | 8.8  | 53.9        | 90.6  |
|                       | Patients (#)          |             | 9.8               | 14.6 | 14.4 | 15.0 |             |       |
| $n_2 = 33; N(d) = 15$ | Selection (%)         | 0.6         | 5.4               | 68.4 | 15.7 | 9.8  | 54.3        | 90.0  |
|                       | Patients (#)          |             | 10.0              | 14.4 | 14.7 | 15.2 |             |       |
| $n_2 = 27; N(d) = 21$ | Selection (%)         | 0.7         | 4.3               | 72.8 | 14.1 | 8.1  | 67.7        | 91.5  |
|                       | Patients (#)          |             | 11.3              | 18.4 | 18.7 | 19.3 |             |       |
| <i>Scenario 7</i>     |                       |             |                   |      |      |      |             |       |
|                       | $\pi_T^{true}(d_j)$   |             | 0.03              | 0.05 | 0.1  | 0.15 |             |       |
|                       | $\pi_R^{true}(d_j)$   |             | 0.4               | 0.5  | 0.6  | 0.5  |             |       |
|                       | $\bar{U}^{true}(d_j)$ |             | 66.1              | 70.3 | 73.5 | 68.6 |             |       |
|                       | $\xi^{true}(d_j)$     |             | 0.3               | 0.45 | 0.65 | 0.4  |             |       |
| $n_2 = 39; N(d) = 9$  | Selection (%)         | 3.7         | 2.0               | 14.1 | 71.2 | 9.1  | 53.2        | 90.8  |
|                       | Patients (#)          |             | 11.1              | 14.1 | 16.0 | 12.0 |             |       |
| $n_2 = 33; N(d) = 15$ | Selection (%)         | 3.3         | 2.0               | 15.0 | 70.9 | 8.8  | 52.2        | 90.6  |
|                       | Patients (#)          |             | 11.2              | 13.7 | 15.1 | 12.1 |             |       |
| $n_2 = 27; N(d) = 21$ | Selection (%)         | 2.4         | 1.5               | 13.3 | 75.9 | 7.0  | 63.9        | 92.3  |
|                       | Patients (#)          |             | 13.3              | 16.7 | 18.6 | 15.2 |             |       |
| <i>Scenario 8</i>     |                       |             |                   |      |      |      |             |       |
|                       | $\pi_T^{true}(d_j)$   |             | 0.15              | 0.2  | 0.25 | 0.4  |             |       |
|                       | $\pi_R^{true}(d_j)$   |             | 0.6               | 0.7  | 0.6  | 0.5  |             |       |
|                       | $\bar{U}^{true}(d_j)$ |             | 71.8              | 77.8 | 68.5 | 56.4 |             |       |
|                       | $\xi^{true}(d_j)$     |             | 0.45              | 0.6  | 0.45 | 0.4  |             |       |
| $n_2 = 39; N(d) = 9$  | Selection (%)         | 8.7         | 22.6              | 58.0 | 9.0  | 1.6  | 50.0        | 90.7  |
|                       | Patients (#)          |             | 18.9              | 16.1 | 10.0 | 5.0  |             |       |
| $n_2 = 33; N(d) = 15$ | Selection (%)         | 9.1         | 23.4 <sub>9</sub> | 56.9 | 9.0  | 1.6  | 47.7        | 90.5  |
|                       | Patients (#)          |             | 17.7              | 14.8 | 9.9  | 5.3  |             |       |
| $n_2 = 27; N(d) = 21$ | Selection (%)         | 8.1         | 20.9              | 61.2 | 8.7  | 1.1  | 56.6        | 91.5  |
|                       | Patients (#)          |             | 19.8              | 17.4 | 12.9 | 6.4  |             |       |

Table S3. (continued)

| $n_2; N(d)$           |                       | Dose levels       |      |      |      |      | Sample size | R (%) |
|-----------------------|-----------------------|-------------------|------|------|------|------|-------------|-------|
|                       |                       | 0                 | 1    | 2    | 3    | 4    |             |       |
|                       |                       | <i>Scenario 9</i> |      |      |      |      |             |       |
|                       | $\pi_T^{true}(d_j)$   |                   | 0.02 | 0.1  | 0.2  | 0.5  |             |       |
|                       | $\pi_R^{true}(d_j)$   |                   | 0.6  | 0.6  | 0.6  | 0.6  |             |       |
|                       | $\bar{U}^{true}(d_j)$ |                   | 76.3 | 73.5 | 70.2 | 60.4 |             |       |
|                       | $\xi^{true}(d_j)$     |                   | 0.4  | 0.45 | 0.6  | 0.65 |             |       |
| $n_2 = 39; N(d) = 9$  | Selection (%)         | 1.4               | 14.3 | 24.2 | 51.8 | 8.3  | 53.7        | 89.7  |
|                       | Patients (#)          |                   | 17.8 | 17.0 | 13.5 | 5.4  |             |       |
| $n_2 = 33; N(d) = 15$ | Selection (%)         | 1.3               | 18.2 | 22.5 | 51.2 | 6.8  | 51.6        | 88.7  |
|                       | Patients (#)          |                   | 17.2 | 15.6 | 12.8 | 5.9  |             |       |
| $n_2 = 27; N(d) = 21$ | Selection (%)         | 1.0               | 14.3 | 21.9 | 55.7 | 7.1  | 62.0        | 90.2  |
|                       | Patients (#)          |                   | 19.4 | 18.9 | 16.6 | 7.0  |             |       |
